# The persistence in time of distributional patterns in marine megafauna impacts zonal conservation strategies

C. Lambert<sup>\*1</sup>, G. Dorémus<sup>2</sup> and V. Ridoux<sup>1,2</sup>

<sup>1</sup>Centre d'Etude Biologique de Chizé, UMR 7372 CNRS/La Rochelle Université, 5 allées de l'Océan, 17000 La Rochelle, France

<sup>2</sup>Observatoire PELAGIS, UMS 3462 CNRS/La Rochelle Université, 5 allées de l'Océan, 17000 La Rochelle, France

## Abstract

The main type of zonal conservation approaches corresponds to Marine Protected Areas (MPAs), which are spatially defined and generally static entities aiming at the protection of some target populations by the implementation of a management plan. For highly mobile species the relevance of an MPA over time might be hampered by temporal variations in distributions or home ranges. In the present work, we used habitat model-based predicted distributions of cetaceans and seabirds within the Bay of Biscay from 2004 to 2017 to characterise the aggregation and persistence of mobile species distributional patterns and the relevance of the existing MPA network. We explored the relationship between population abundance and spatial extent of distribution to assess the aggregation level of species distribution. We used the smallest spatial extent including 75% of the population present in the Bay of Biscay to define specific core areas of distributions, and calculated their persistence over the 14 studied years. We inspected the relevance of the MPA network with respect to aggregation and persistence. We found that aggregation and persistence are two independent features of marine megafauna distributions. Indeed, strong persistence was shown in both aggregated (bottlenose dolphins, auks) and loosely distributed species (northern gannets), while some species with aggregated distributions also showed limited year-to-year persistence in their patterns (black-legged kittiwakes). We thus have demonstrated that both aggregation and persistence have potential impact on the amount of spatio-temporal distributional variability encompassed within static MPAs. Our results exemplified the need to have access to a minimal temporal depth in the species distribution data when aiming to designate new site boundaries for the conservation of mobile species.

Keywords: zonal conservation, Bay of Biscay, persistence, core areas, aggregation, Marine Protected Areas

---

<sup>\*</sup>Corresponding author, electronic address: [charlotte.lambert@univ-lr.fr](mailto:charlotte.lambert@univ-lr.fr)

# 1 Introduction

Marine Protected Areas (MPAs) are spatially defined and are generally static entities aiming at the protection of some target populations through the implementation of a management plan (Kelleher, 1999). In general, MPA design aims at optimising the protection of key areas of distributions by encompassing high spatial aggregations of individuals within rather small protected areas, *i.e.* the critical habitats of target species (Hooker & Gerber, 2004). Critical habitats of a species include the habitats required for successful breeding and foraging ensuring its survival and population growth. In the case of endothermic top predators (*i.e.* seabirds and marine mammals), these critical habitats can be separated in both space and time, sometimes very distantly apart, as these species can cover thousands of kilometres per year (as for seabirds, pinnipeds or baleen whales for example; Game et al., 2009; Lewison et al., 2015).

For seabirds and pinnipeds, resting and breeding sites are well-known critical habitats, as seabird colonies and seal haul-out sites are generally well identified, and their protection is made easier by the aggregation of large amounts of individuals in restricted coastal areas (Game et al., 2009). However, the time spent within these areas is often small compared to the time spent outside, where species remain unprotected despite potentially important cumulative threats (Hooker & Gerber, 2004). Yet, both foraging habitats and access to these foraging resources are subject to a combination of major threats (acoustic and chemical pollutions, physical habitat destruction, marine debris, overfishing) and would require adequate protection. Due to the lack of knowledge about the at-sea distributions of marine top predator, especially in oceanic waters (Game et al., 2009), their protection remained poor. In the past few years, effort has been made toward extension of the coastal networks of marine protected areas (MPAs) to offshore waters in order to encompass such particular areas (*e.g.* Skov et al., 2007; Notarbartolo Di Sciara et al., 2008; Arcos et al., 2012; Garthe et al., 2012; Delavenne et al., 2017; Heinänen & Skov, 2015). This is particularly the case in the European Union where Member States are currently designating offshore sites completing the existing coastal networks of MPAs (see INPN, 2018, in France).

Although this effort of extension to the offshore top predators diversity hotspot is of crucial importance, the relevance of zonal strategies (*i.e.* establishing static MPAs) can be questioned for the conservation of highly mobile marine endothermic predators. Indeed ocean is highly dynamic in both space and time (Longhurst, 2007; Game et al., 2009), and mobile endothermic top predators are known to track the spatially and temporally varying features of interest to sustain their growth and reproduction (Ballance et al., 2006; Weimerskirch, 2007). Despite some site-fidelity linked to particular phase of their life cycle (*i.e.* reproduction, especially for seabirds or pinnipeds), habitat preferences exhibited by endothermic top predators when at-sea could be expected to vary depending on the environmental conditions experienced by species on a particular year and at a particular season (Lambert et al., 2017a, 2018). These temporally varying preferences might induce more or less important variations in distribution. For example, a breeding seabird should adjust its at-sea habitat use depending on the available environmental conditions around its colony, or odontocetes should change their distribution to match the spatial variation of their favourable habitats between years. These spatial variations in distribution might thus lead to variations in the relevance of a static MPA over years (Game et al., 2009; Lewison et al.,

37 2015). Species with loose distribution or with strong temporal variations might more benefit from non-zonal  
38 conservation approaches, such as full national or international protection. As a result, a better understanding  
39 of the aggregation and persistence of distributional patterns of target species would ultimately help to make  
40 choice between policy instruments.

41 This study aimed at elucidating the effect of predator mobility on static MPA relevance in the Bay of Biscay  
42 (BoB), France, where oceanographic multi-disciplinary cruises have been conducted every spring since 2003. All  
43 seabirds and marine mammals are fully protected at the national level (against destruction, mutilation, capture,  
44 transport...) in France, but they, and their habitat, also benefit from the specific protection and conservation  
45 measures provided by various MPAs designated under diverse jurisdictional status. Seabirds are protected by  
46 Natura 2000 sites under the European Birds Directive, while marine mammals and their habitat are protected  
47 under the Natura 2000 Habitat Directive (only four species: harbour porpoise, bottlenose dolphin, grey and  
48 harbour seals). Both taxa are protected by a set of Marine Natural Parks as well. Within the Bay of Biscay,  
49 in 2018, 99 MPAs include 3 Marine Natural Parks (French Marine Natural Parks, 2019), 58 Natura 2000 sites  
50 designated under the Habitats Directive and 38 Natura 2000 sites designated under the Birds Directive (INPN,  
51 2018). Among those Natura 2000 sites, two offshore sites of large extent have been designated in 2018 to achieve  
52 the EU Member States objectives of offshore waters protection (Delavenne et al., 2017; Journal Officiel, 2018).

53 We explored the implication of species mobility for zonal conservation strategies by following two main  
54 steps: (i) characterising the distributional patterns of mobile species based on two parameters, their aggregation  
55 level and their persistence; (ii) assessing the relevance of existing MPAs regarding those two parameters. We  
56 computed predictions of the distribution of eight taxa (seven seabirds, one cetacean) for each year from 2004 to  
57 2017 in the Bay of Biscay based on habitat modelling computed from oceanographic cruise data. We identified  
58 the aggregation level of species from the relationship between population abundance and spatial extent of  
59 distribution, expecting aggregated species to have a large proportion of their population located into small  
60 areas. We defined the smallest spatial extent including 75% of the Bay of Biscay population (following a  
61 method similar to the one implemented by Nur et al., 2011) as the core area of distribution of a species, and  
62 their persistence was calculated over the 14 studied years. Finally, we explored whether the MPA network would  
63 actually be adequate for the protection of the eight studied groups of species in respect with their core areas of  
64 distribution and their persistence, and discussed the implication of such spatially varying distributions for the  
65 conservation of mobile marine predators through static MPAs.

## 66 2 Material and Methods

### 67 2.1 Data source

68 This study builds from observation data obtained through the pelagic oceanographic cruises PELGAS (*PELag-*  
69 *iques GAScogne*), conducted by IFREMER (French research institute for the exploration of the sea) onboard  
70 the research vessel *Thalassa*, which sample long transects perpendicular to the coast over the shelf every year

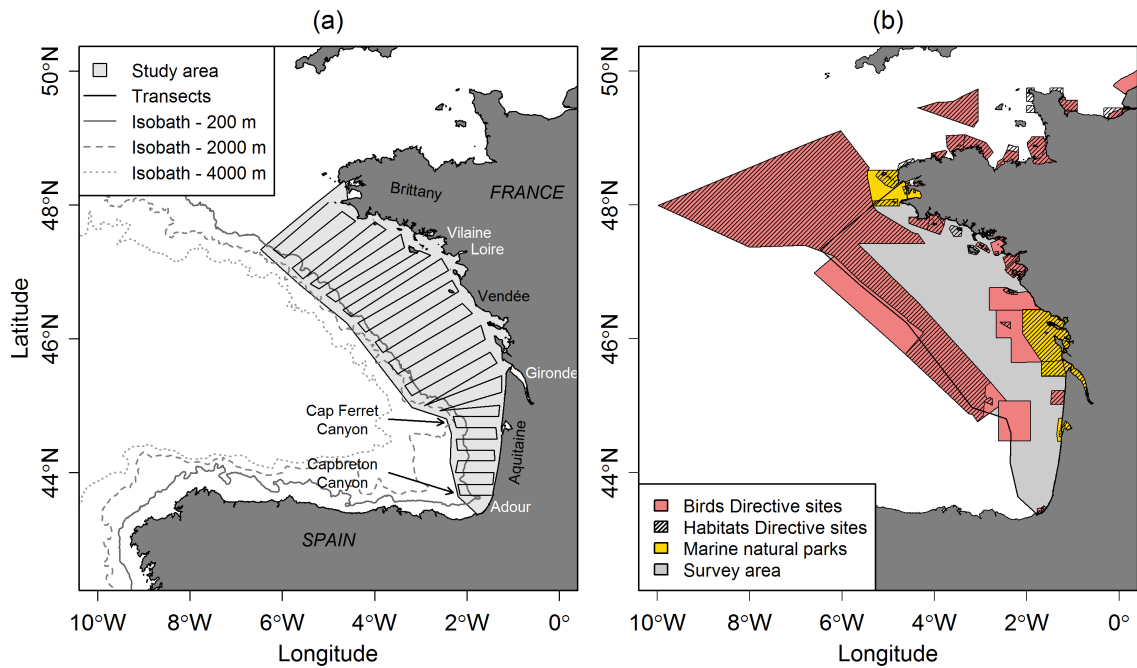

**Figure 1.** (a) Study area and theoretical sampling design of PELGAS survey. Names of four main estuaries in white, names of other geographical localities and main canyons in black; (b) French Marine Protected Areas (MPAs) in the Bay of Biscay and English Channel. This study considered only sites overlapping the survey area. Birds Directive sites were assessed only for seabirds, Habitats Directive sites only for cetaceans.

71 in May/June (Figure 1a; Doray et al., 2018). Top predator observations were collected following a line transect  
72 protocol (Buckland et al., 2001) over the period 2004–2017. In-situ environmental variables were routinely  
73 collected along transects: surface and bottom temperatures, salinity, mixed layer depth and surface chlorophyll  
74 a concentration (Doray et al., 2018).

75 Our analysis builds from the habitat models produced by and described in (Lambert et al., 2018). The  
76 habitat modelling procedure mostly used environmental variables collected *in-situ* during the oceanographic  
77 cruises, but also some environmental variables derived from remote-sensing sources and from bathymetric grid  
78 of the ocean (Appendix A). The procedure takes into account the variability of habitat preferences across  
79 years by selecting between a global model (considering the relationship with environmental variables similar  
80 over years) and an interaction model (integrating the interaction between variables and years, allowing the  
81 relationship to change between years). The habitat modelling procedure is detailed in the Appendix A, along  
82 with maps of predicted densities in individual per square kilometres for each studied years (2004–2017) for the  
83 eight taxa.

84 Here, we discarded the common dolphin from the set of studied species from (Lambert et al., 2018) as habitat  
85 modelling failed to predict correctly their distributions, but considered three more taxa, whose distribution were  
86 predicted following the same procedure. During at-sea data collection, some individuals are impossible to tell  
87 apart between closely related species exhibiting close morphology and behaviour. As a result, we focused on  
88 a set of individual species and taxa composed of several closely related species: bottlenose dolphin (*Tursiops*  
89 *truncatus*); northern fulmar (*Fulmarus glacialis*); small-sized shearwaters (Manx *Puffinus puffinus* and Balearic  
90 *P. mauretanicus* shearwaters); storm petrels (European *Hydrobates pelagicus*, Leach's *H. leucorhous* and band-

91 rumped *Hydrobates castro* storm-petrels); northern gannets (*Morus bassanus*); great skua (*Catharacta skua*);  
92 auks (common guillemot *Uria aalge* and razorbill *Alca torda*); black-legged kittiwake (*Rissa tridactyla*).

## 93 **2.2 Distribution patterns**

### 94 **2.2.1 Aggregation level**

95 We first transformed density maps from habitat models to abundance maps by multiplying predicted density  
96 by cell surface. The abundance maps were then transformed into proportion maps, *i.e.* the abundance of each  
97 cell was related to the total abundance predicted within the study area (sum all cells within the PELGAS  
98 stratum). For each species and each year, all cells were sorted by decreasing predicted proportions and the  
99 cumulative sum was computed. We explored the aggregation level of each species distribution by plotting the  
100 cumulative sum of abundance proportion against the corresponding cumulative sum of surface for each species  
101 and year. Aggregated species were identified as species with high proportions of population concentrated into  
102 small surface *versus* larger surface for broadly distributed species (relationship closer to linearity).

### 103 **2.2.2 Core areas of distribution and their persistence**

104 The smallest spatial extent including 75% of the population identified the core areas of distribution of studied  
105 taxa. Based on the cumulative sum of abundance proportion, the set of cells containing 75% of the population  
106 was assigned the value of "1", all remaining cells were assigned "0".

107 The persistence of core areas was calculated as the number of years each cell belonged to the core area  
108 (category 1). Habitat models being built on *in-situ* variables, some cells have no prediction for years during  
109 which they were not sampled. To take into account this variation, the number of years a cell belonged to the  
110 core area was divided by the number of years each cell was sampled. The persistence was thus expressed as the  
111 proportion of sampled years a cell was included in the core area of distribution.

## 112 **2.3 MPA relevance within the Bay of Biscay**

113 The proportions of core areas of distributions actually falling within MPAs for each studied year was quantified  
114 to assess the relevance of MPAs within the Bay of Biscay: we considered all cells of the core area whose centre  
115 was inside an MPA as included in that MPA. We quantified as well the proportions of persistent cells (*i.e.*  
116 belonging to the core area at least 50% of surveyed years) whose centres fall within MPAs.

117 We assessed Bird Directive sites for seabirds, and Habitats Directive sites for bottlenose dolphin (Figure 1b).  
118 The Bird Directive sites target the protection of bird species, while the Habitats Directive sites aim at protecting,  
119 among other species, the bottlenose dolphin habitat. We only considered sites overlapping with the study area.

## 120 3 Results

### 121 3.1 Habitat modelling

122 The interaction model was selected for most species (all but bottlenose dolphins and storm petrels; Appendix A),  
123 indicating their relationship to their habitat might vary to some extent across years. Selected models resulted  
124 in reasonably good explain deviances (from 21.7% for storm petrels to 58.9% for black-legged kittiwakes, with  
125 an average of 40.5%) and fitted well the observed distribution of species across years.

126 The seven studied taxa exhibited different predicted distribution patterns (Figure 2; see Appendix A for  
127 yearly predicted distributions). Bottlenose dolphins exhibited the less variable and most aggregated spatial  
128 distribution, with a very clear preference for the shelf edge (Appendix A3). Kittiwakes also exhibited an  
129 aggregated distribution, with highest predicted densities along the coast of northern BoB (Appendix A4). Auks  
130 were the third most aggregated taxon, occurring mostly along the coast during the fourteen years, especially  
131 within river plumes (Appendix A5). Storm petrels were predicted over the whole northern BoB shelf and offshore  
132 Basque country (Appendix A6). The northern fulmars were mostly predicted over the slope and outer shelf  
133 of the BoB, avoiding coastal areas, during the fourteen years (Appendix A7). The distribution of small-sized  
134 shearwaters varied more between years, but they remained mostly predicted in inner and central shelf areas of  
135 the northern BoB (Appendix A8). Northern gannets were distributed over the whole BoB, with higher densities  
136 in the northern part (Appendix A9).

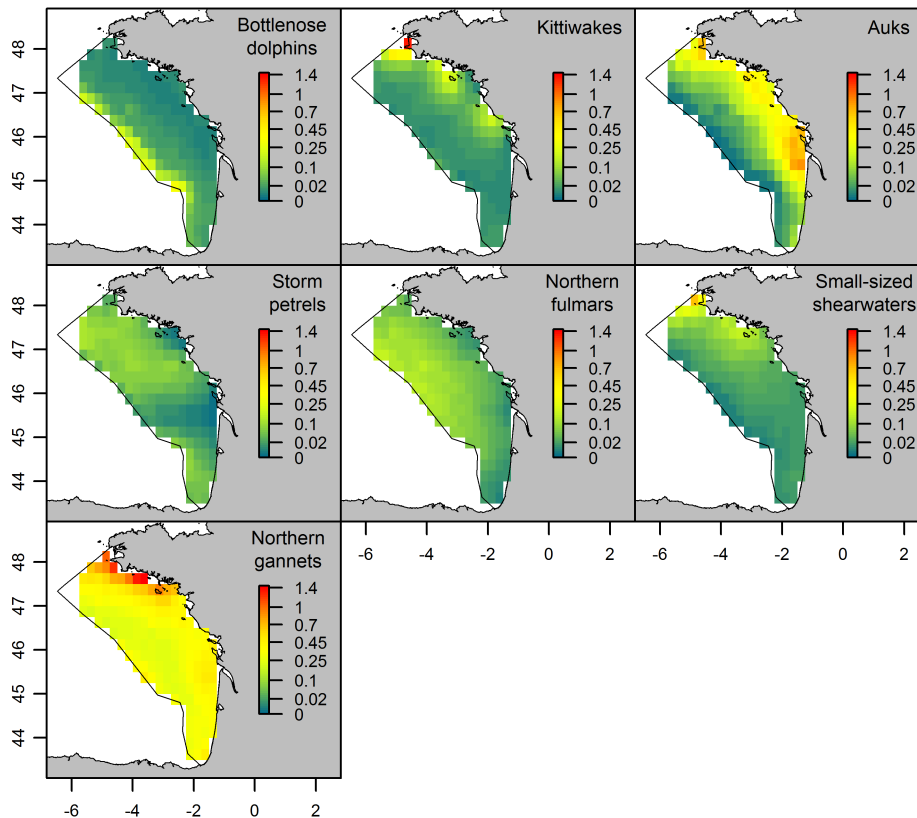

**Figure 2.** Predicted densities (individual/km<sup>2</sup>) averaged over the fourteen studied years for the seven studied taxa.

### 137 3.2 Aggregation levels

138 We expected species with an aggregated distribution to have high proportions of population in small surface  
139 compared to species with a loose distribution.

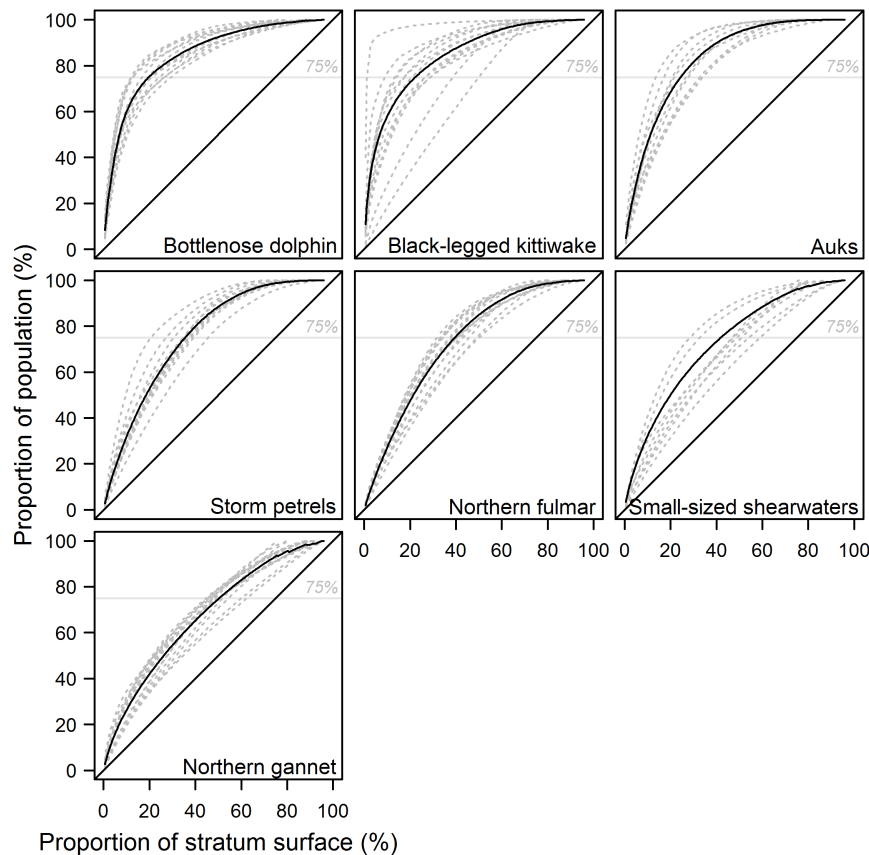

**Figure 3.** Relationships between the proportions of population covered and the corresponding proportions of stratum surface for the seven studied taxa. Annual relationships are dotted grey lines, the averages over the fourteen years are plain black lines. The 75% of population threshold used to determine core areas is shown in grey.

140 Bottlenose dolphins, black-legged kittiwakes and auks presented the highest aggregation levels among the  
141 studied species, their core areas showing the smallest spatial extent (Figure 3). In average, 75% of the population  
142 was encompassed within 20, 23 and 25% of the study area, respectively. The curves rapidly reached this value,  
143 then the proportion of population levelled off with the increase of stratum surface proportion. The aggregation  
144 level varied somehow across years for bottlenose dolphins and auks, but the overall relationship remained the  
145 same throughout the studied years (Figure 3). Bottlenose dolphins core areas were restricted to the shelf edge  
146 during all the studied years (Appendix B1), while auks were mostly aggregated over river plumes from the  
147 Vilaine to Gironde estuaries, with some years core areas occurring within the Adour river plume (2004–2009;  
148 Appendix B3 ; see Figure 1 for location of these estuaries). However, the black-legged kittiwake distribution  
149 showed different pattern of aggregation during three of the studied years, being highly aggregated in a few cells  
150 in some years (2017), but broadly distributed in two others (relationships tending toward linearity, 2005–2006;  
151 Figure 3). Overall, black-legged kittiwakes were mainly aggregated in southern Brittany, with an extension  
152 down to the Gironde estuary during some years (Appendix B2).



153 An intermediate aggregation level in distribution was observed for storm petrels, northern fulmars and  
154 small-sized shearwaters, with, in average, 75% of the population included in 36, 39 and 42% of the study area,  
155 respectively (Figure 3). A similar pattern was observed for all studied years, showing only limited variations,  
156 for storm petrels and northern fulmars. Storm petrels had a main core area located in the northern part of the  
157 BoB, whose extent varied somehow across years, and a secondary one over the shelf edge of the southern BoB  
158 during some years (Appendix B4). Northern fulmar core areas were consistently located over the outer shelf  
159 of the northern part of the study area (Appendix B5). The small-sized shearwaters aggregation level increased  
160 throughout the studied years (Figure 3) due to a contraction of their core areas in the north of the study area  
161 (Appendix B6). The spatial extent covered by 75% of the population shifted from 50–60% of the study area  
162 (broad distribution, with a relationship tending toward linearity) in 2004–2010 to 21% in 2017.

163 Northern gannets exhibited broad distribution with reduced aggregation level (Figure 3; Appendix B7).  
164 Their relationships between population and surface was almost linear, with very few variations across years. In  
165 average, 75% of the population occupied 45–60% of the study area.

### 166 3.3 Persistence of core areas

167 Bottlenose dolphins exhibited the largest spatial consistency across years, and their core area of distribution  
168 was strongly persistent (Figure 4a): the bottlenose dolphin core area of distribution (representing only 21% of  
169 the study area; Figure 4b) was located over the shelf edge 100% of surveyed years, and the vast majority of  
170 the BoB was never encompassed within the species core areas. Kittiwakes had the lowest core areas persistence  
171 due to the spatial variation of its core area across years (Figure 4a). Kittiwakes were nevertheless located off  
172 Brittany and along the Vendée coast during more than 50% of the studied years, which represented 21% of  
173 the study area (Figure 4b). The extreme north of the BoB had a persistence larger than 80% of years, but  
174 those cells were sampled during less than 10 of the studied years. Auks' core areas had strong persistence, with  
175 estuaries being included in a core areas more than 50% of surveyed years (Figure 4a), resulting in a persistent  
176 area (*i.e.* more than 50% of surveyed years) representing 29% of the study area (Figure 4b). The rest of the  
177 shelf was never used by auks. The storm petrels' core area located in the northern BoB was persistent across  
178 years (>80% of surveyed years; Figure 4a). The second core area, located in the southern BoB, was a bit less  
179 persistent (about 50% of surveyed years). The persistence of northern fulmar core areas was high, with a large  
180 area over the outer shelf being included in core areas more than 90% of years the cells were surveyed (Figure 4a).  
181 The same occurred for small-sized shearwaters, for which a large amount of cells was persistent more than 80%  
182 of surveyed years, from the southern Brittany to the Gironde estuary (Figure 4a). For those three species, 45,  
183 45, 48% of the survey area was persistently included in core areas (*i.e.* more than 50% of surveyed years; Figure  
184 4b). The northern gannets were widely distributed over the BoB across all the years, and all cells were included  
185 in a core area at least during one year (Figure 4a). The most persistent areas were located off Brittany and  
186 off the Gironde estuary. 65% of the Bay of Biscay belonged to a core area for at least 50% of surveyed years  
187 (Figure 4b).



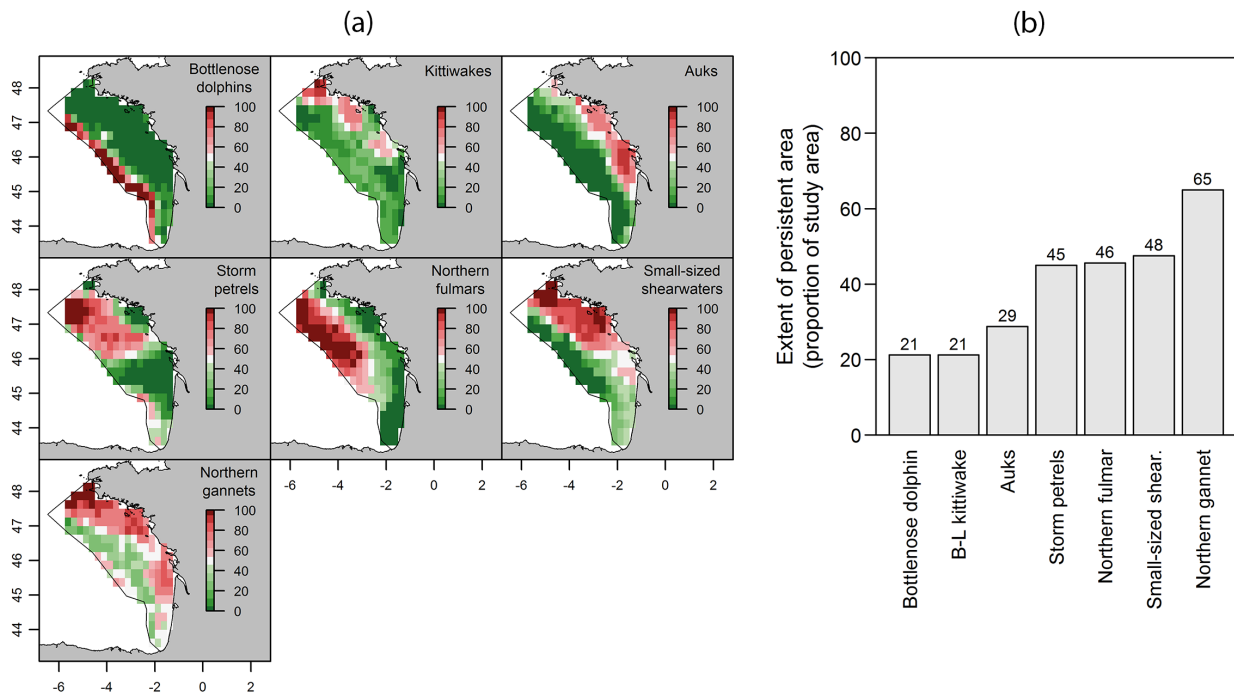

**Figure 4.** (a) Persistence of core areas of distributions by species. The persistence is expressed as the proportion of surveyed year a cell was included in species' core area of distribution (in percent). (b) Spatial extent of persistent area by species, expressed as the proportions of the study area included in core areas more than 50% of the studied years, in percent.

### 3.4 MPA relevance within the Bay of Biscay

In the BoB, the Bird Directive sites are currently covering 68% of the stratum cells, Habitats Directive sites 58%. The above-identified core areas of distribution covered variable proportions of the study area, depending on species but also depending on years. The aggregation levels of species and the location of core areas led to varying amount of core areas being actually included within MPAs.

Thanks to their aggregated and persistent distribution over years, the proportion of bottlenose dolphin core areas within MPAs did not vary much, but was quite high thanks to the new offshore Habitats Directive site covering the shelf edge (42–67%; Figure 5). The proportion of core areas of black-legged kittiwakes in MPAs were highly variable across years, from 21% to 80% (100% in 2017 when the core area was made of only 1 cell; Figure 5), as a result of their core areas being poorly persistent. Auks were among species with aggregated distribution persistent over time, resulting in fairly high proportion of core areas in MPAs, from 35 to 68% (Figure 5). Storm petrels, northern fulmars, small-sized shearwaters were more widespread, their larger core areas being well persistent. As a result the proportion of their core areas in MPAs were medium, and showed low variation across years (24–35% for storm petrels, 33–51% for northern fulmars, 19–37% for small-sized shearwaters; Figure 5). Northern gannets were widespread, with large core areas, but these showed some variations in distribution across years, leading to variable proportions of core areas covered by MPAs, from 25 to 59% in MPAs (Figure 5).

The proportions of persistent area (*i.e.* area included in core areas more than 50% of the studied years)

206 included in MPAs varied across species (Figure 6). Thanks to the strong persistence and aggregation of their  
 207 core area over the shelf edge, 59% of the bottlenose dolphin persistent area was included in MPA (the largest  
 208 proportions among studied species; Figure 6). Black-legged kittiwakes, auks, northern fulmars, small-sized  
 209 shearwaters and northern gannets showed similar medium proportions of persistent area in MPAs (34–49%,  
 210 Figure 6). Storm petrels persistent areas were the least covered by MPAs, with only 32% (Figure 6).

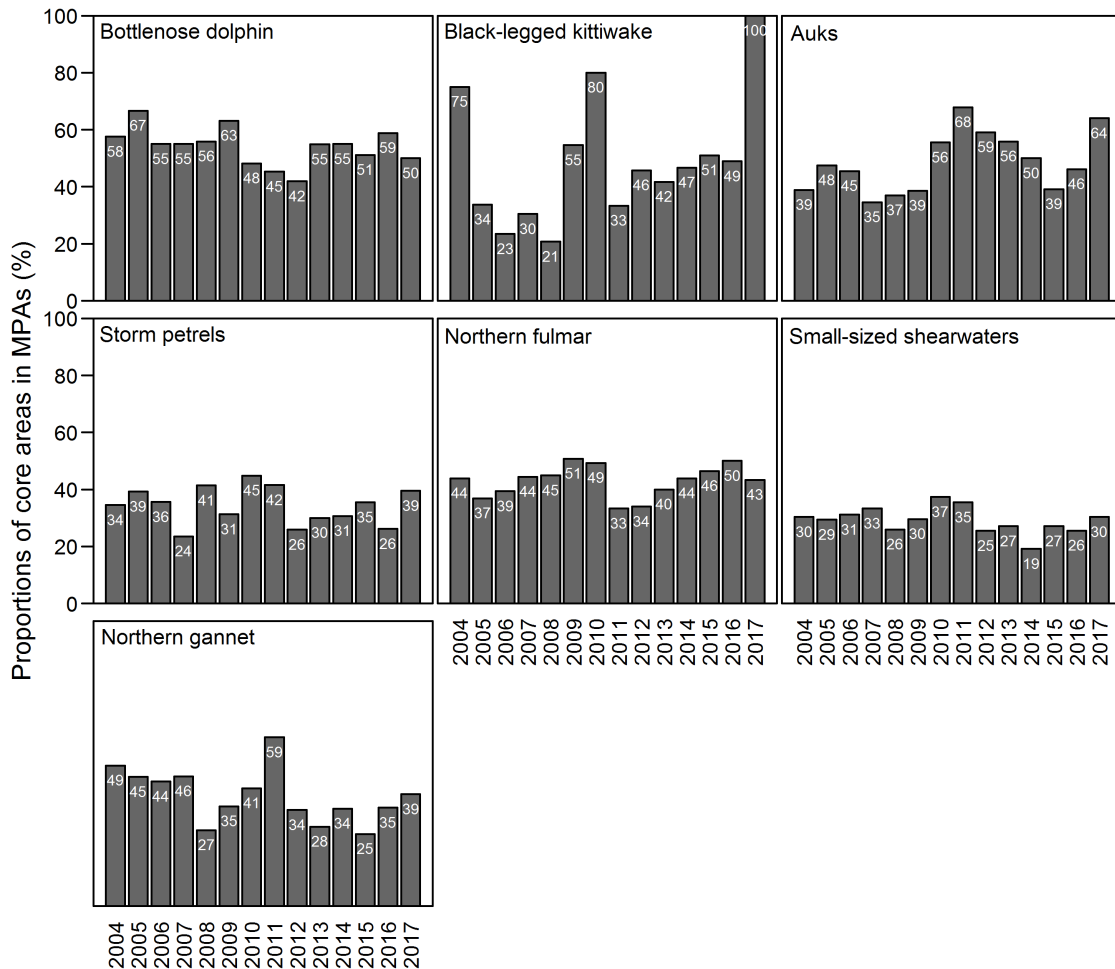

**Figure 5.** Proportions of core areas encompassed within existing MPAs (Marine Natural Parks and Bird Directive sites for seabirds; Marine Natural Park and Habitat Directive sites for bottlenose dolphins) along the fourteen years for the eight studied groups of species, in percent. The proportion is indicated in each bar.

## 211 4 Discussion

212 The Bay of Biscay is a rather small area compared to some offshore MPAs implemented worldwide, such as the  
 213 Pelagos Marine Sanctuary or the Coral Sea Commonwealth Marine Reserve, but the surveys conducted annually  
 214 since 2004 were a unique opportunity to investigate some of the main limitations of zonal conservation strategies  
 215 for mobile species (Game et al., 2009; Wilson, 2016). Those limitations are linked to the mobility of animals,  
 216 in terms of movements and relationships to habitat, but also to the variability of pelagic habitats, which are  
 217 hard to characterise and highly dynamic in space and time. These combined factors lead to the conclusion that  
 218 for such species, a relevant protection would necessitate larger areas as movement rates increase (Hooker &

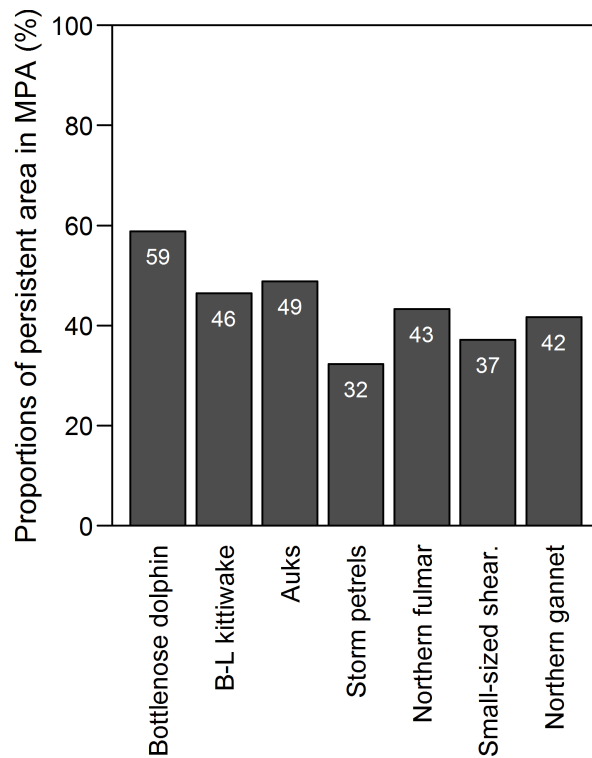

**Figure 6.** Proportions of persistent areas (cells included in core areas more than 50% of the studied years) encompassed within existing MPAs (Marine Natural Parks and Bird Directive sites for seabirds; Marine Natural Parks and Habitat Directive sites for bottlenose dolphins) for the eight studied species, in percent. The proportion is indicated in each bar.

219 Gerber, 2004; Lewison et al., 2015). However, marine predators represent a wide range of species with various  
220 distributional patterns, and many species are known to target discrete and predictable oceanographic features  
221 (Ballance et al., 2006; Weimerskirch, 2007). Such aggregated species might well benefit from zonal conservation  
222 approaches (Oppel et al., 2018). In addition, some species might be more vulnerable within a small proportion  
223 of their range. All these elements make possible to meet conservation objectives by focusing on a few critical  
224 areas (Game et al., 2009).

225 Here, we aimed at investigating the effect of temporal variability in distribution for a set of marine top  
226 predators on the potential protection by static MPAs. First, we were successful in characterising the habi-  
227 tats available within our study region thanks to the use of a PCA based on *in-situ* environmental conditions  
228 monitored simultaneously to the megafauna survey (Lambert et al., 2018). The quality of models was reason-  
229 able to fairly good regarding the standard of habitat modelling for these organisms (good deviances and good  
230 predictions–sightings adequacy; see for comparison: Vilchis et al., 2006; Becker et al., 2014; Breen et al., 2017;  
231 Lambert et al., 2017a). The habitat modelling highlighted a range of habitat strategies based on the specificity  
232 and inter-annual stability of species preferences. Species exhibiting narrower habitat preferences also exhibited  
233 stronger stability in their preferences among years (*e.g.* bottlenose dolphins and auks) while the species with  
234 wider habitat preferences exhibited higher variability among years (*e.g.* northern gannets; see Lambert et al.,  
235 2018). This variability of preferences might either originate in species being flexible in their preferences or in  
236 the actual seasonal timing of the pelagic ecosystem varying in some extent across years, ultimately driving some  
237 differences in relationships of species to their habitat. Yet, despite this possible variation in seasonal timing,

238 the oceanographic cruise always occur during the reproductive period of studied species. As such, we are con-  
239 fident that the conclusion presented here regarding the impact of the persistence of distributional pattern on  
240 zonal conservation are reliable for adjusting conservation measures during this highly critical period that is the  
241 breeding period.

242 Of course the results presented would benefit from a similar study to be implemented over the rest of the  
243 year. Indeed, previous study highlighted seasonal variations of habitat preferences and distribution of cetaceans  
244 and seabirds in the Bay of Biscay (Lambert et al., 2017a; Laran et al., 2017; Pettex et al., 2017), showing  
245 limited seasonal differences in distribution for bottlenose dolphins and northern fulmars, but large differences in  
246 distribution for black-legged kittiwakes, auks and northern gannets between summer and winter. The small-sized  
247 shearwaters are completely absent from the study region during winter. An extension of the present study to  
248 other seasons would mostly benefit to black-legged kittiwakes, auks and northern gannets, as their difference in  
249 distribution is in part due to the individuals present in the study area during winter being of different population  
250 than during summer. Unfortunately however, we still lack dataset with sufficient temporal depth to replicate  
251 the present study during other seasons.

252 Given the observed range of habitat strategies exhibited by taxa studied during their breeding period, we  
253 found various levels of temporal variability in aggregation and location of core areas according to the species. The  
254 relationship between the proportion of population and surface clearly identified several species with aggregated  
255 distributions on small areas, such as bottlenose dolphins, kittiwakes and auks (75% of the population was  
256 concentrated over 22% of the area, in average), and other species with broader distributions, such as northern  
257 gannet (75% of the population was spread over 50% of the area, in average). As such, we confirm that for zonal  
258 conservation to be effective for a target species, the latter needs to have an aggregated distribution (Oppel  
259 et al., 2018), but these areas of higher density must also be persistent in time. Our results showed varying  
260 patterns depending on species, highlighting that aggregation and persistence do not always covary: bottlenose  
261 dolphins and auks exhibited aggregated distribution with strong persistence over the decade; storm petrels,  
262 northern fulmars and northern gannets were widespread species with medium to high persistence but black-  
263 legged kittiwakes were an aggregated species with low persistence.

264 Theoretically, species with more persistent distributions should be the easiest to protect with zonal con-  
265 servation strategy, and the more the distribution is aggregated, the smaller the required protected area would  
266 have to be. In our case, it would be possible to design MPAs based on the persistent distributional patterns for  
267 bottlenose dolphins, auks, storm petrels, northern fulmars, small-sized shearwaters and northern gannets. The  
268 resulting MPA would be fairly small for bottlenose dolphin and auks, thanks to their aggregated distribution,  
269 but would be larger for storm petrels, northern fulmars and small-sized shearwaters (50% of the study area).  
270 In case of aggregated species with lower persistence (black-legged kittiwakes) and species loosely distributed  
271 with important persistence area (northern gannets) in contrast, the establishment of a zonal conservation would  
272 necessitate a large MPA, to encompass all the observed temporal variability in core area distributions in one  
273 case, to encompass the whole persistent area in the other case. Those species might benefit more from non-zonal  
274 conservation approaches, such as national or international regulation of incidental mortalities linked to fisheries

275 bycatches, or extraction of foraging resources at a larger scale for example. In the Bay of Biscay in particular,  
276 all species benefit from a generic national and european-level protection from direct destruction, in addition to  
277 the particular conservation measures implemented in MPAs.

278 Here, our goal was not to propose new sites, since many MPAs already exists which currently cover 68% of  
279 the study area for the Bird Directive sites, 52% for the Habitats Directive sites. The investigation of the overlap  
280 between species core areas and these MPAs showed that bottlenose dolphins and auks, the two most aggregated  
281 taxa with strong persistence, had the highest coverage by MPA with reduced temporal variability. This was  
282 achieved through the important coastal network of MPA for auks. The boundaries for Habitats Directive and  
283 Bird Directive sites were historically proposed mostly based on expert's knowledge of coastal distributions, with  
284 poor information on their temporal variability, and *a fortiori* on the target species at-sea distributions leading  
285 to a succession of small and large sites along the BoB coast, ensuring a good coverage of the auks distribution.  
286 The important coverage of bottlenose dolphin distribution (59% of its core area) was largely ensured by the  
287 new offshore Habitats Directive site (see Figure 1) that has recently been designated, along with an equivalent  
288 Bird Directive site, based on dedicated large-scale surveys (SAMM surveys; Lambert et al., 2017a; Laran et al.,  
289 2017; Pettex et al., 2017) within French waters to compensate for the previous absence of any protected sites  
290 within offshore waters (Delavenne et al., 2017).

291 Our results demonstrate the interest of these new sites for the bottlenose dolphin, as they included most of its  
292 range, but also for northern fulmars and storm petrels. Those two latter taxa were more broadly distributed than  
293 the bottlenose dolphin, with larger core areas strongly persistent over the outer shelf. Prior to the designation  
294 of the offshore sites, they were as poorly covered by the coastal network of MPAs as the bottlenose dolphin  
295 (Lambert et al., 2017b), but here, we demonstrated that the offshore sites contain an important proportion of  
296 their persistent core areas (32% of storm petrels, 43% of northern fulmars). The BoB slope has recently been  
297 identified as an area with important densities of marine species whose distributional range up to now poorly  
298 overlapped with any MPAs (Klein et al., 2015). Among marine species, mammals are the species group with the  
299 lowest proportions of species range overlapping with MPAs. Our results demonstrated that the designation of  
300 the two new large offshore sites was a crucial advance toward the protection of species with offshore distribution  
301 (both mammals and seabirds), but remains to be confirmed by the establishment of an efficient management  
302 plan, a work in progress at present.

303 Despite these positive points, we showed that fairly large proportions of the core persistent areas (more  
304 than half) fell outside MPAs in our study area for all species but bottlenose dolphins. Yet, the BoB belongs  
305 to the ocean's most impacted areas by cumulative human impacts (Halpern et al., 2008, 2015). We can thus  
306 wonder whether these medium to low levels of protection represent a brake to the effectiveness of conservation  
307 strategies implemented within the BoB. In his recent editorial, Wilson (2016) argue that the lag between the  
308 identification and the designation of MPAs would inevitably lead to a drop of densities within MPAs, due to  
309 the dynamic drivers of species distributions and to their mobility inducing temporally varying distributional  
310 patterns, as shown here. However, the protection of half of a species core area is surely better than providing  
311 no protection at all, especially if the protected areas cover core area with higher threats or species vulnerability

312 (Game et al., 2009): several case studies have shown that protecting critical habitats or reducing area-specific  
313 threats can strongly reduce overall mortality rates in spite of the mitigation action taking part on a small part  
314 of the species ranges (e.g. Hyrenbach et al., 2006; Alpine & Hobday, 2007). Therefore, despite the intermediate  
315 to limited proportions of core and persistent areas of species distributions within MPAs in the BoB, the target  
316 species should theoretically benefit from the implemented zonal conservation strategies. This is particularly  
317 true for offshore distributed species that had very low level of zonal protection before the establishment of the  
318 two offshore sites (Lambert et al., 2017b). Obviously, the assessment of the actual efficiency of those boundaries  
319 would be completely dependent on the relevance and efficiency of the management plans to be defined and  
320 implemented within each single MPAs (Edgar et al., 2014) and remains to be addressed at the BoB scale.

## 321 5 Conclusion

322 Our results showed varying levels of temporal persistence in distributional patterns according to predator species  
323 combined with various levels of aggregation in distribution. The important result here was that these two factors  
324 did not necessarily covary, since strong persistence was shown in both aggregated and loosely distributed species,  
325 while some species with aggregated distributions also showed limited year-to-year persistence in their patterns.  
326 As a consequence, we have demonstrated that these two factors have potential impact on the amount of spatio-  
327 temporal distributional variability encompassed within static MPAs implemented over the study area. Our  
328 results exemplified the need to have access to a minimal temporal depth in the species distribution data when  
329 aiming at designating new site boundaries for the conservation of mobile species, as this would be the only way  
330 to minimize the bias linked to the species and environment mobility (as discussed by Game et al., 2009; Wilson,  
331 2016).

## 332 Acknowledgements

333 The authors have no competing interests to declare. CL was funded by the French ministry in charge of research  
334 (*Ministère de l'Enseignement Supérieur et de la Recherche*, MESR) during her PhD. We are indebted to crew  
335 members on-board the R/V *Thalassa*, to all observers who participated in the surveys as well as to the French  
336 Office of Biodiversity (*Office Français de la Biodiversité*, OFB) and French ministry of environment (*Ministère  
337 de la Transition Écologique et Solidaire*) who funded the megafauna observers. Paul Bourriau and Martin Huret  
338 are thanked for taking care of the CTD casts and maintaining the hydrological sensors, Matthieu Doray for his  
339 coordination of the survey.

## 340 Data accessibility

341 Data from the PELGAS surveys used for this analysis are freely accessible on the Sea scientific open data edition  
342 (SEANOE) repository at <http://doi.org/10.17882/53389> (Doray et al., 2018).

## 343 References

- 344 Alpine J, Hobday A, 2007 “Area requirements and pelagic protected areas: is size an impediment to implemen-  
345 tation?” *Marine and Freshwater Research* **58** 558–569 13
- 346 Arcos J M, Bécares J, Villero D, Brotons L, Rodríguez B, Ruiz A, 2012 “Assessing the location and stability of  
347 foraging hotspots for pelagic seabirds: an approach to identify marine important bird areas (ibas) in Spain”  
348 *Biological Conservation* **156** 30–42 1
- 349 Ballance L T, Pitman R L, Fiedler P C, 2006 “Oceanographic influences on seabirds and cetaceans of the eastern  
350 tropical Pacific: a review” *Progress in Oceanography* **69** 360–390 1, 10
- 351 Becker E A, Forney K A, Foley D G, Smith R C, Moore T J, Barlow J, 2014 “Predicting seasonal density  
352 patterns of California cetaceans based on habitat models” *Endangered Species Research* **23** 1–22 10
- 353 Breen P, Cañadas A, Cadhla O Ó, Mackey M, Scheidat M, Geelhoed S C, Rogan E, Jessopp M, 2017 “New in-  
354 sights into ocean sunfish (*Mola mola*) abundance and seasonal distribution in the northeast Atlantic” *Scientific*  
355 *Reports* **7** 2025 10
- 356 Buckland S T, Anderson D R, Burnham K P, Laake J L, Borchers D L, Thomas L, 2001 *Introduction to Distance*  
357 *Sampling: Estimating Abundance of Biological Populations* (Oxford ; New York: OUP Oxford) 3
- 358 Delavenne J, Lepareur F, Witté I, Touroult J, Lambert C, Pettex E, Virgili A, Sibley J, 2017 “Spatial conser-  
359 vation prioritization for mobile top predators in French waters: Comparing encounter rates and predicted  
360 densities as input” *Deep Sea Research Part II: Topical Studies in Oceanography* **141** 275–284 1, 2, 12
- 361 Doray M, Petitgas P, Huret M, Duhamel E, Dupuy C, Romagnan J B, Spitz J, Authier M, Sanchez F, Berger L,  
362 Dorémus G, Bourriau P, Grellier P, Massé J, 2018 “The PELGAS survey: ship-based integrated monitoring  
363 of the Bay of Biscay pelagic ecosystem” *Progress in Oceanography* **166** 15–29 3, 13
- 364 Edgar G J, Stuart-Smith R D, Willis T J, Kininmonth S, Baker S C, Banks S, Barrett N S, Becerro M A,  
365 Bernard A T, Berkhout J, et al., 2014 “Global conservation outcomes depend on marine protected areas with  
366 five key features” *Nature* **506** 216–220 13
- 367 French Marine Natural Parks, 2019 “Le parc naturel marin” [http://www.aires-marines.fr/Les-aires-marines-  
368 protegees/Categories-d-aires-marines-protegees/Parc-naturel-marin](http://www.aires-marines.fr/Les-aires-marines-protegees/Categories-d-aires-marines-protegees/Parc-naturel-marin) 2
- 369 Game E T, Grantham H S, Hobday A J, Pressay R J, Lombard A T, Beckley L E, Gjerde K, Bustamante R,  
370 Possingham H P, Richardson A J, 2009 “Pelagic protected area: the missing dimension in ocean conservation”  
371 *Trends in Ecology & Evolution* **24** 360–369 1, 9, 10, 13
- 372 Garthe S, Markones N, Mendel B, Sonntag N, Krause J C, 2012 “Protected areas for seabirds in German  
373 offshore waters: designation, retrospective consideration and current perspectives” *Biological Conservation*  
374 **156** 126–135 1



- 375 Halpern B S, Frazier M, Potapenko J, Casey K S, Koenig K, Longo C, Lowndes J S, Rockwood R C, Selig E R,  
376 Selkoe K A, et al., 2015 “Spatial and temporal changes in cumulative human impacts on the world’s ocean”  
377 *Nature communications* **6** 12
- 378 Halpern B S, Walbridge S, Selkoe K A, Kappel C V, Micheli F, D’Agrosa C, Bruno J F, Casey K S, Ebert C,  
379 Fox H E, Fujita R, Heinemann D, Lenihan H S, Madin E M P, Perry M T, Selig E R, Spalding M, Steneck  
380 R, Watson R, 2008 “A Global Map of Human Impact on Marine Ecosystems” *Science* **319** 948–952 12
- 381 Heinänen S, Skov H, 2015 “The identification of discrete and persistent areas of relatively high harbour porpoise  
382 density in the wider UK marine area” Technical report Joint Nature Conservation Committee 1
- 383 Hooker S K, Gerber L R, 2004 “Marine reserves as a tool for ecosystem-based management: the potential  
384 importance of megafauna” *BioScience* **54** 27–39 1, 9
- 385 Hyrenbach K, Veit R R, Weimerskirch H, et al., 2006 “Seabird associations with mesoscale eddies: the subtropical  
386 Indian Ocean” *Marine Ecology Progress Series* **324** 271–279 13
- 387 INPN, 2018 “French Natura 2000 documentation” [http://inpn.mnhn.fr/programme/natura2000/  
388 presentation/objectifs](http://inpn.mnhn.fr/programme/natura2000/presentation/objectifs) 1, 2
- 389 Journal Officiel, 2018 “Arrêté du 18 janvier 2018 portant désignation du site natura 2000 mers celtiques - talus  
390 du golfe de gascogne (zone de protection spéciale)”  
391 URL <https://www.legirance.gouv.fr/eli/arrete/2018/1/18/TRELI1732565A/jp/texte> 2
- 392 Kelleher G, 1999 *Guidelines for Marine Protected Areas* xxiv +107pp (Gland, Switzerland and Cambridge, UK.:  
393 IUCN) 1
- 394 Klein C J, Brown C J, Halpern B S, Segan D B, McGowan J, Beger M, Watson J E, 2015 “Shortfalls in the  
395 global protected area network at representing marine biodiversity” *Scientific reports* **5** 17539 12
- 396 Lambert C, Authier M, Doray M, Dorémus G, Spitz J, Ridoux V, 2018 “Decadal stability in top predator  
397 habitat preferences in the Bay of Biscay” *Progress in Oceanography* **166** 109–120 1, 3, 10
- 398 Lambert C, Pettex E, Dorémus G, Laran S, Stephan E, Van Canneyt O, Ridoux V, 2017a “How does ocean  
399 seasonality drive habitat preferences of highly mobile top predators? Part II: The Eastern North-Atlantic.”  
400 *Deep Sea Research Part II: Topical Studies in Oceanography* **141** 133–154 1, 10, 11, 12
- 401 Lambert C, Virgili A, Pettex E, Delavenne J, Toison V, Blanck A, Ridoux V, 2017b “Habitat modelling predic-  
402 tions highlight seasonal relevance of Marine Protected Areas for marine megafauna” *Deep Sea Research Part*  
403 *II: Topical Studies in Oceanography* **141** 262–274 12, 13
- 404 Laran S, Authier M, Blanck A, Doremus G, Falchetto H, Monestiez P, Pettex E, Stephan E, Canneyt O V,  
405 Ridoux V, 2017 “Seasonal distribution and abundance of cetaceans within French waters- Part II: The Bay  
406 of Biscay and the English Channel” *Deep Sea Research Part II: Topical Studies in Oceanography* **141** 31–40  
407 11, 12

- 408 Lewison R, Hobday A J, Maxwell S, Hazen E, Hartog J R, Dunn D C, Briscoe D, Fossette S, O’Keefe C E, Barnes  
409 M, et al., 2015 “Dynamic ocean management: identifying the critical ingredients of dynamic approaches to  
410 ocean resource management” *BioScience* **biv018** 1, 10
- 411 Longhurst A R, 2007 *Ecological geography of the sea* 2nd edition (Academic Press) 1
- 412 Notarbartolo Di Sciara G, Agardy T, Hyrenbach D, Scovazzi T, Van Klaveren P, 2008 “The PELAGOS Sanc-  
413 tuary for Mediterranean marine mammals” *Aquatic Conservation: Marine and Freshwater Ecosystems* **18**  
414 367–391 1
- 415 Nur N, Jahncke J, Herzog M P, Howar J, Hyrenbach K D, Zamon J E, Ainley D G, Wiens J A, Morgan K,  
416 Ballance L T, et al., 2011 “Where the wild things are: predicting hotspots of seabird aggregations in the  
417 California Current System” *Ecological Applications* **21** 2241–2257 2
- 418 Oppel S, Bolton M, Carneiro A P, Dias M P, Green J A, Masello J F, Phillips R A, Owen E, Quillfeldt P, Beard  
419 A, et al., 2018 “Spatial scales of marine conservation management for breeding seabirds” *Marine Policy* **98**  
420 37–46 10, 11
- 421 Pettex E, Laran S, Authier M, Blanck A, Dorémus G, Falchetto H, Lambert C, Monestiez P, Stéfan r, Van Can-  
422 neyt O, Ridoux V, 2017 “Using large scale survey to investigate seasonal variations in seabird distribution  
423 and abundance. Part II: the Bay of Biscay and the English Channel” *Deep Sea Research Part II: Topical*  
424 *Studies in Oceanography* **141** 86–101 11, 12
- 425 Skov H, Durinck J, Leopold M F, Tasker M L, 2007 “A quantitative method for evaluating the importance of  
426 marine areas for conservation of birds” *Biological Conservation* **136** 362–371 1
- 427 Vilchis L I, Ballance L T, Fiedler P C, 2006 “Pelagic habitat of seabirds in the eastern tropical Pacific: effects  
428 of foraging ecology on habitat selection” *Marine Ecology Progress Series* **315** 279–292 10
- 429 Weimerskirch H, 2007 “Are seabirds foraging for unpredictable resources?” *Deep Sea Research Part II: Topical*  
430 *Studies in Oceanography* **54** 211–223 1, 10
- 431 Wilson B, 2016 “Might marine protected areas for mobile megafauna suit their proponents more than the  
432 animals?” *Aquatic Conservation: Marine and Freshwater Ecosystems* **26** 3–8 9, 12, 13
