# Supplementary material for: The persistence in time of distributional patterns in marine megafauna impacts zonal conservation strategies
Source: bioRxiv or medRxiv preprint supplement (doi:10.1101/790634), 2020-03-05

# Appendix B

## Core areas of distribution

Based on predicted abundances, we identified the smallest sets of pixels including 50% of the population, highlighting core areas of distribution. Core areas are in black, the remaining study area with prediction in grey. See text for details.

### 1. Bottlenose dolphin

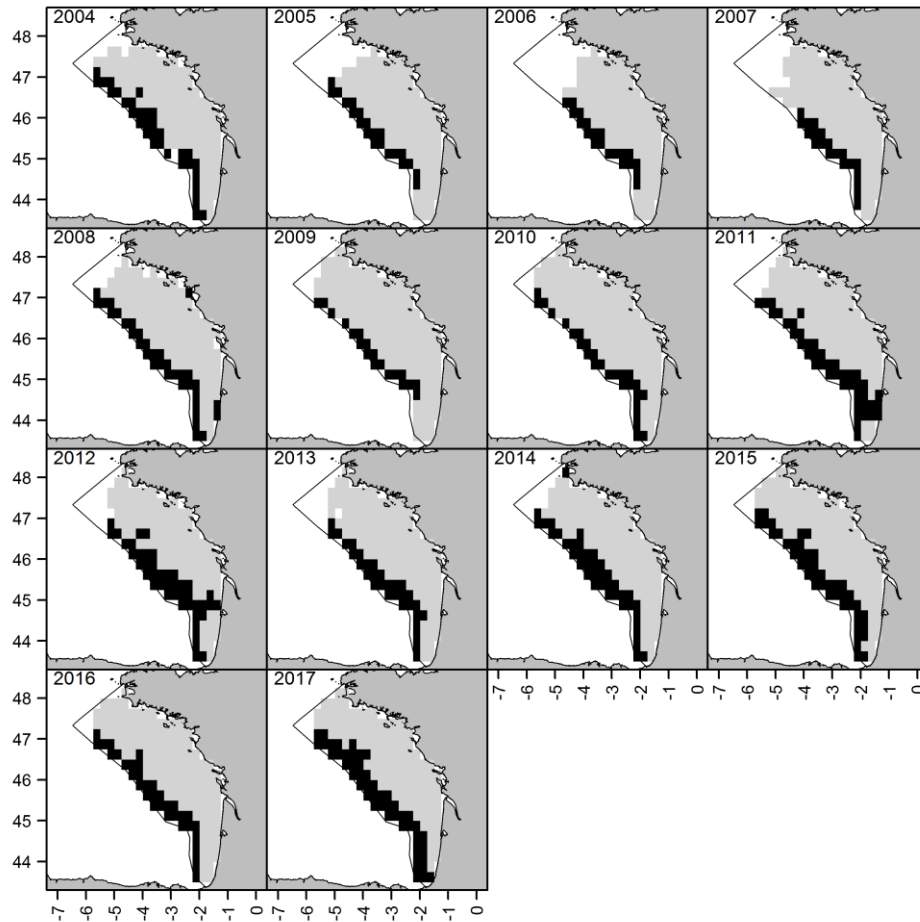

2. Black-legged kittiwake

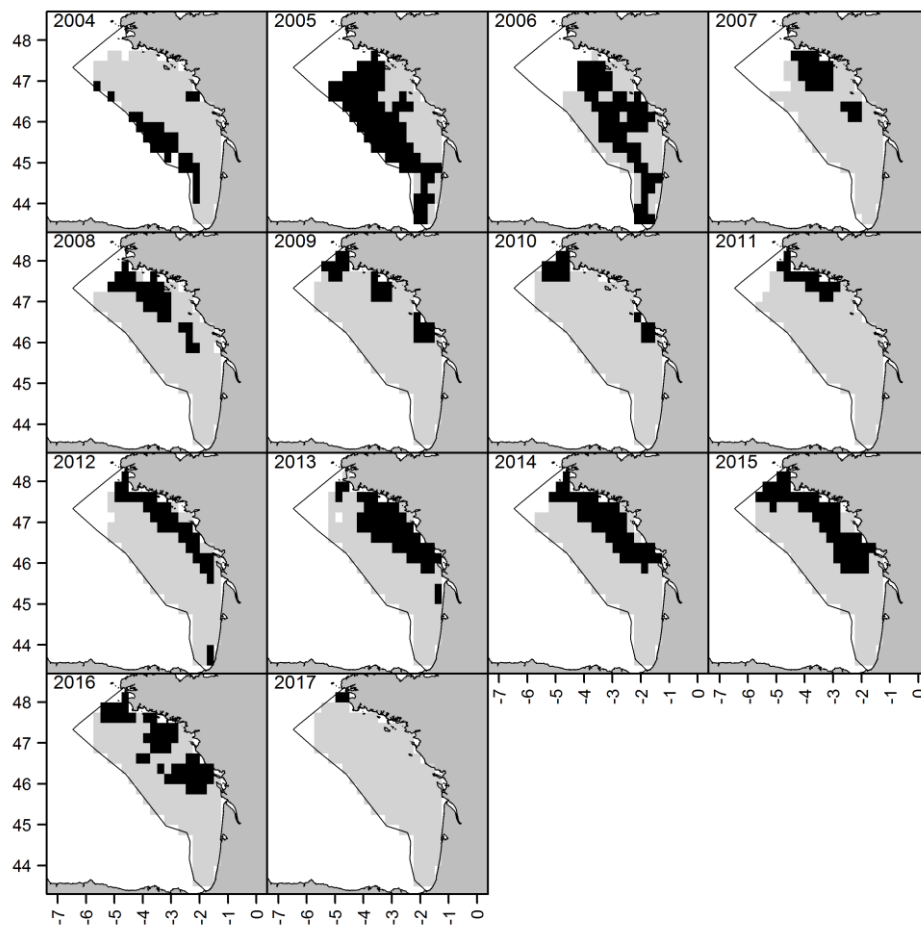

3. Auks

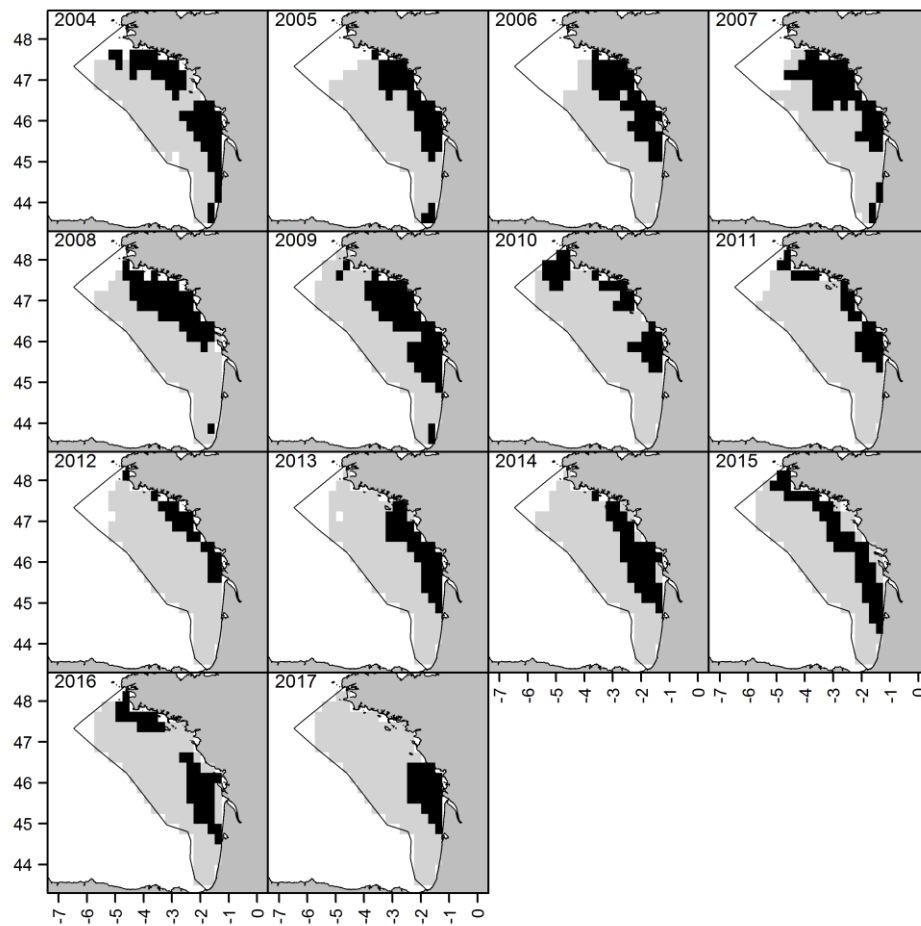

4. Storm petrels

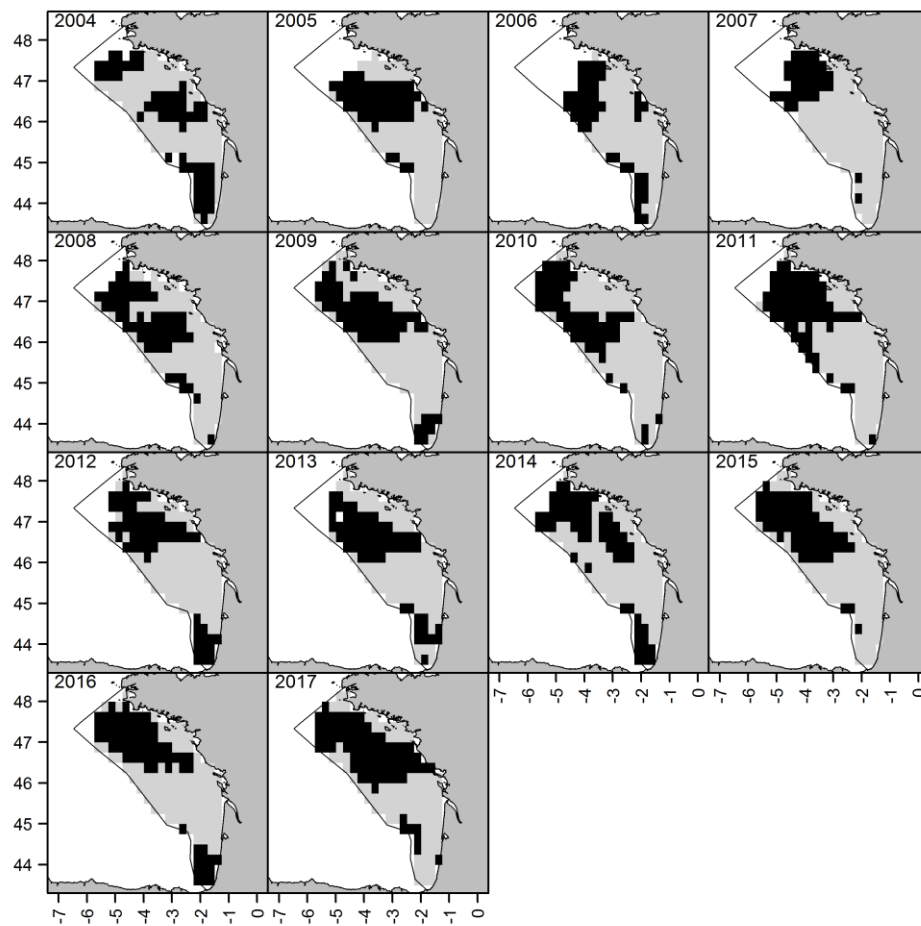

5. Northern fulmar

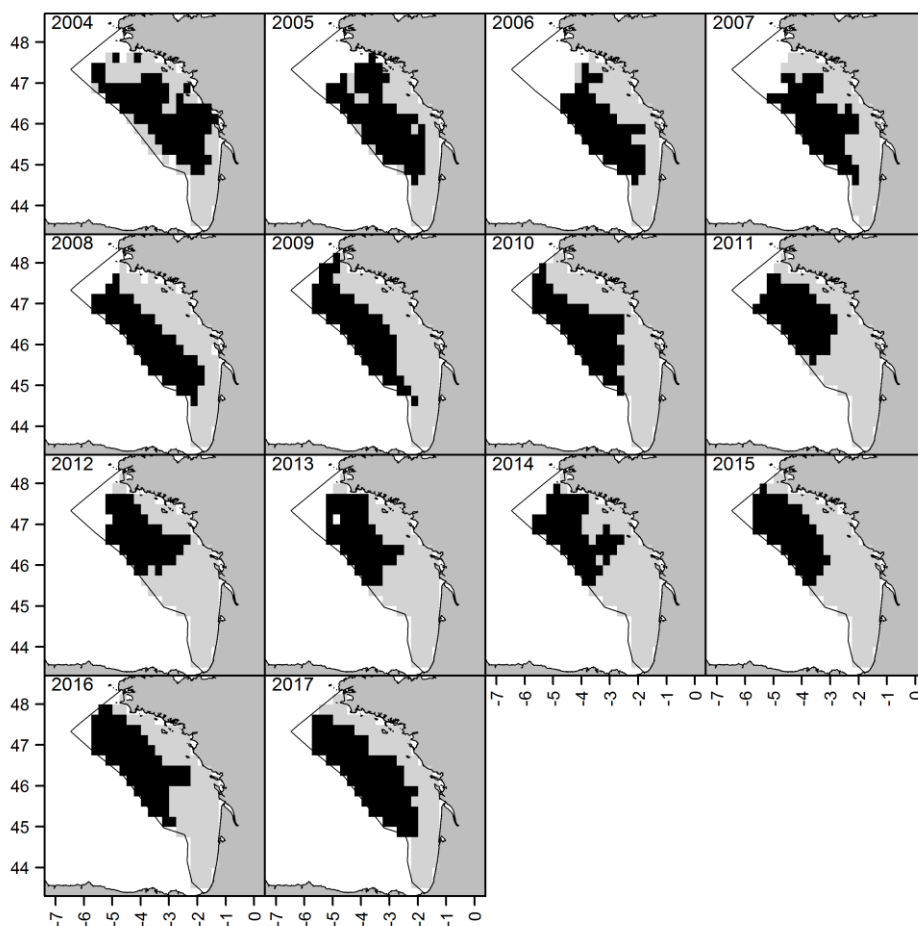

6. Small-sized shearwaters

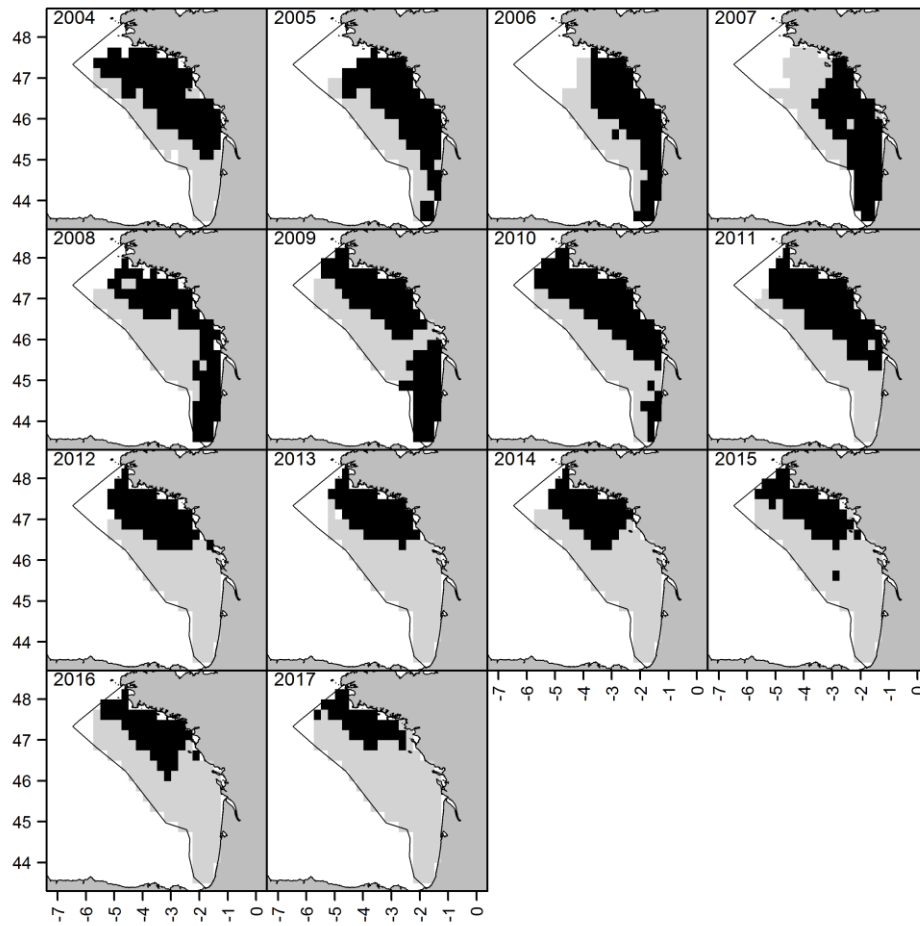

7. Northern gannet

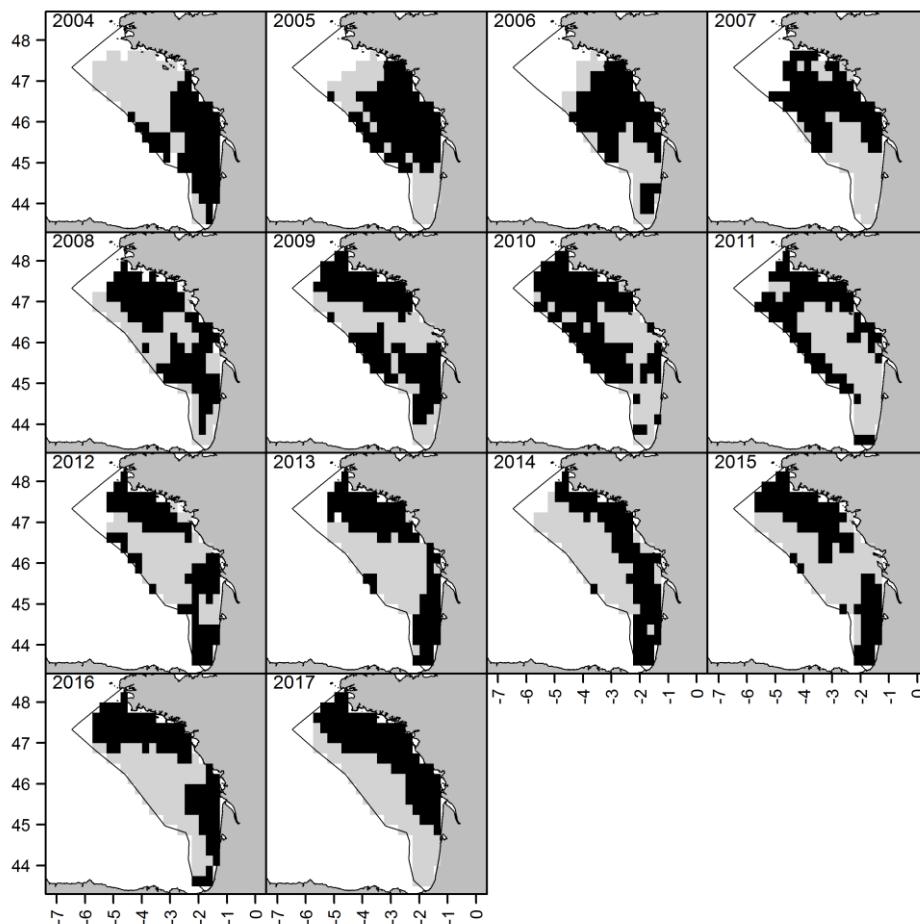

Supplement: Supplementary file [file media-2.pdf]
